# Supplementary material for: Adsorption and desorption characteristics of alcohol vapors on a nanoporous ZIF-8 film investigated using silicon microcantilevers
Source: Royal Society of Chemistry journal article supplement (doi:10.1039/c5cc01315a), 2015-01-01
Supplement: c5cc01315a1.pdf [file c5cc01315a1.pdf]

## Adsorption and desorption characteristics of alcohol vapors on a nanoporous ZIF-8 film investigated using silicon microcantilevers

Changyong Yim,<sup>a</sup> Moonchan Lee,<sup>a</sup> Wuseok Kim,<sup>a</sup> Sanghee Lee,<sup>a</sup> Gook-Hee Kim,<sup>b</sup> Kyong Tae Kim<sup>b</sup> and Sangmin Jeon<sup>a,\*</sup>

<sup>a</sup>Department of Chemical Engineering, Pohang University of Science and Technology (POSTECH), Pohang, Gyeongbuk, Republic of Korea

<sup>b</sup>Clean Coal Chemicals Research Project, Research Institute of Industrial Science and Technology (RIST), Pohang, Gyeongbuk, Republic of Korea

\* Author to whom correspondence should be addressed. E-mail: jeons@postech.ac.kr

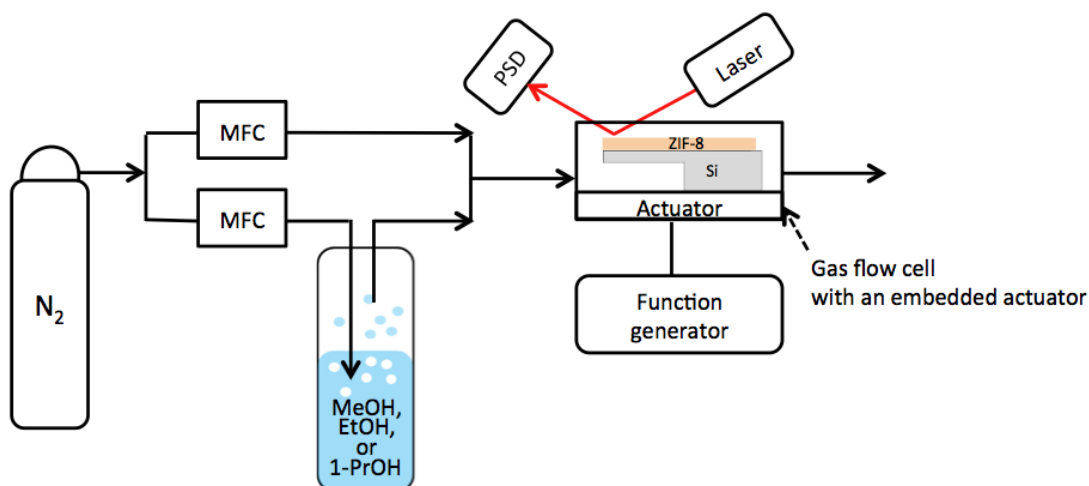

**Figure S1.** Schematic illustration of the instrument set-up.
